# Supplementary material
Source: publisher site journal article supplement (https://www.degruyter.com/publication/journal_key/PM/downloadAsset/PM_Information_for_Authors.pdf)
Supplement: Supplementary file 1 [file PM_Information_for_Authors.pdf]

## Information for authors

Please provide the following details/information:

### Format

**a) Full paper:** this well-established and successful format allows the presentation and discussion of your scientific research to the full extent. You can submit a paper written in German or English and we will arrange for the translation. Thus you will reach the greatest possible readership worldwide.

**b) Failure Analysis:** this compact publication format can also be submitted in German or English. It serves as a practical example from industry for the presentation of a failure analysis.

### Author(s)

Correspondence address, Names written in full, Country, E-Mail address

### Keywords

Name maximum 10 keywords characterizing the content of your paper and the investigated materials.

### Abstract

The length of the abstract should not exceed 10 lines.

### Introduction

Please outline the aim of your paper and relate it to its field of study and to recent investigations on this topic.

### Main Part

Please submit your paper in English or German as a word.doc. The translation of your manuscript will be arranged by the Editorial Office. The publisher will afterwards send you a proof of the type-set text in which you can make your final corrections. The main part should not include footers, footnotes, automatic numeration etc. Please do not arrange tables, table and figure captions within the text but at the end of your paper.

### Figures and Figure Captions

Please do not arrange figures within the text, but deliver them as single files. Figure Captions should be listed in a numbered sequence at the end of the manuscript (word.doc). All microscopic pictures and graphical presentations are needed as \*.tif or \*.jpg image files with a solution of at least 300 dpi. Please make sure that the  $\mu$ -scale and internal text are big enough to be visible even after reduction caused by the layouting. Compound figures, e.g. figures 1a to 1c are to send in separately.

### Tables and Table Captions

Please do not arrange tables within the text. Please list all tables and table captions at the end of your manuscript in a numbered sequence.

## References

Please arrange all references according to their sequence and appearance in the text and verify their completeness in order that our readers will be able to find the original literature easily. Please use the following format for the bibliography due to unification reasons:

- [1] pattern of a Journal
- [2] pattern of a Book
- [3] pattern of a Paper
- [4] pattern of a patent

- [1] Walker, C.B.; Schneider, S.: Acta metall. 39 (1980) 8, 370-375
- [2] Walker, C.B.; Schneider, S.: Schleifen und Polieren, 3. Auflage, Hanser-Verlag, München, Deutschland, 1989, S. 320ff
- [3] Walker, C.B.; Schneider, S.: Schleifen und Polieren, in: Proc. Int. Conf. Metallography, 1997, G. Petzow (Ed.), Springer-Verlag, Berlin, 1998
- [4] Theiner W. A.; Altpeter I.: DE Patent No. 4235387, 21. Okt. 1992

## Introduction of the Authors (Photo and Short Biography)

In response to numerous requests from our readers, we would like to introduce the two main authors. In accordance with the character of the journal, we suggest to introduce the corresponding author and the person responsible for the practical/experimental part of the work.

Please provide both short CVs in English (320 characters including free spaces).

## Before sending, please check the following aspects:

- text in word file
- single picture files in sufficient quality
- 2x short biography and pictures
- bibliography in the given format (see above)

## Please submit your manuscript:

Via e-mail: pm-editor@matsci.uni-sb.de  
Via mail (CD-ROM) Prof. Dr. Frank Mücklich  
Saarland University  
Functional Materials  
Postbox 151150  
66041 Saarbrücken  
Tel.: +49 681 302 70500  
Fax.: +49 681 302 70502
